# Supplementary material for: Longitudinal association between astrocyte function and glucose metabolism in autosomal dominant Alzheimer’s disease
Source: PubMed Central journal article supplement (PMC6333721; doi:10.1007/s00259-018-4217-7), 2018-12-04
Supplement: 259_2018_4217_MOESM1_ESM.pdf [file 259_2018_4217_MOESM1_ESM.pdf]

## Supplementary Material for

### Longitudinal association between astrocyte function and glucose metabolism in autosomal dominant Alzheimer's disease

European Journal of Nuclear Medicine and Molecular Imaging

Authors: Stephen F. Carter<sup>1</sup>, Konstantinos Chiotis<sup>2,3</sup>, Agneta Nordberg<sup>2,4</sup>, Elena Rodriguez-Vieitez<sup>2</sup>

<sup>1</sup> Wolfson Molecular Imaging Centre, Division of Neuroscience and Experimental Psychology, University of Manchester, M20 3LJ Manchester, United Kingdom

<sup>2</sup> Karolinska Institutet, Department of Neurobiology, Care Sciences and Society, Division of Clinical Geriatrics, 141 52 Stockholm, Sweden

<sup>3</sup> Theme Neurology, Karolinska University Hospital, 171 76 Stockholm, Sweden

<sup>4</sup> Theme Aging, Karolinska University Hospital, 141 86 Stockholm, Sweden

Corresponding author: Elena Rodriguez-Vieitez, [elena.rodriguez-vieitez@ki.se](mailto:elena.rodriguez-vieitez@ki.se)

**Supplementary Table 1 Longitudinal relationships between  $^{11}\text{C}$ -DED binding and  $^{18}\text{F}$ -FDG uptake in 12 regions of interest in mutation noncarriers**

| <b>Region</b>              | <b>Fixed-effects coefficient, <math>\beta_1</math> (<math>\pm</math> SE)</b> | <b><i>P</i> value</b> | <b>Degrees of freedom</b> | <b><i>t</i> value</b> | <b><i>F</i></b> | <b><math>R^2_c</math></b> |
|----------------------------|------------------------------------------------------------------------------|-----------------------|---------------------------|-----------------------|-----------------|---------------------------|
| Frontal cortex             | 0.244 $\pm$ 0.270                                                            | 0.381                 | 15.07                     | 0.90                  | 0.82            | 0.73                      |
| Parietal cortex            | 0.183 $\pm$ 0.233                                                            | 0.442                 | 16.76                     | 0.79                  | 0.62            | 0.65                      |
| Temporal cortex            | -0.016 $\pm$ 0.193                                                           | 0.934                 | 14.83                     | -0.08                 | 0.01            | 0.70                      |
| Occipital cortex           | 0.387 $\pm$ 0.223                                                            | 0.099                 | 17.91                     | 1.74                  | 3.02            | 0.73                      |
| Anterior cingulate cortex  | 0.042 $\pm$ 0.193                                                            | 0.829                 | 16.88                     | 0.22                  | 0.05            | 0.74                      |
| Posterior cingulate cortex | 0.009 $\pm$ 0.176                                                            | 0.961                 | 16.95                     | 0.05                  | 0.002           | 0.60                      |
| Insular cortex             | 0.042 $\pm$ 0.138                                                            | 0.764                 | 17.96                     | 0.31                  | 0.09            | 0.77                      |
| Parahippocampus            | 0.021 $\pm$ 0.081                                                            | 0.801                 | 16.01                     | 0.26                  | 0.07            | 0.70                      |
| Caudate nucleus            | 0.287 $\pm$ 0.137                                                            | 0.057                 | 12.74                     | 2.09                  | 4.37            | 0.91                      |
| Putamen                    | 0.107 $\pm$ 0.115                                                            | 0.367                 | 16.65                     | 0.93                  | 0.86            | 0.58                      |
| Thalamus                   | 0.132 $\pm$ 0.123                                                            | 0.301                 | 15.83                     | 1.07                  | 1.14            | 0.59                      |
| Hippocampus                | -0.005 $\pm$ 0.062                                                           | 0.939                 | 15.13                     | -0.08                 | 0.01            | 0.55                      |

Linear mixed-effects models (LMEMs) were used to assess the longitudinal relationships between  $^{11}\text{C}$ -DED binding and  $^{18}\text{F}$ -FDG uptake in 12 regions of interest in mutation noncarriers using the equation:  $^{18}\text{F}\text{-FDG}_{\text{ROI}} \sim \beta_0 + \beta_1 \text{ }^{11}\text{C}\text{-DED}_{\text{ROI}} + \text{Random intercept } (I) + \varepsilon$ , where  $\beta_0$  and  $\beta_1$  are fixed-effects coefficients, Random intercept is a variable that takes into account the repeated measures in the same individual subject number  $I$ , and  $\varepsilon$  is an error term.

$^{11}\text{C}\text{-DED}$  =  $^{11}\text{C}$ -deuterium-L-deprenyl;  $^{18}\text{F}\text{-FDG}$  =  $^{18}\text{F}$ -fluorodeoxyglucose;  $R^2_c$  = conditional coefficient of determination; SE = standard error

**Supplementary Table 2 Results of the linear mixed-effects models to investigate the interaction of Mutation status (carrier/non-carrier) on the longitudinal relationships between <sup>11</sup>C-DED binding and <sup>18</sup>F-FDG uptake in 12 regions of interest in the whole sample of mutation carriers and noncarriers**

| Region                     | Fixed-effects coefficient of interaction term, $\beta_3$ ( $\pm$ SE) | <i>P</i> value | Degrees of freedom | <i>t</i> value | <i>F</i>     | $R^2_c$     |
|----------------------------|----------------------------------------------------------------------|----------------|--------------------|----------------|--------------|-------------|
| Frontal cortex             | 0.746 $\pm$ 0.514                                                    | 0.158          | 28.86              | 1.45           | 2.11         | 0.83        |
| Parietal cortex            | 0.754 $\pm$ 0.373                                                    | 0.052          | 32.87              | 2.02           | 4.08         | 0.80        |
| Temporal cortex            | <b>0.986 <math>\pm</math> 0.351</b>                                  | <b>0.008</b>   | <b>32.22</b>       | <b>2.81</b>    | <b>7.91</b>  | <b>0.87</b> |
| Occipital cortex           | 0.485 $\pm$ 0.385                                                    | 0.218          | 29.97              | 1.26           | 1.59         | 0.81        |
| Anterior cingulate cortex  | 0.616 $\pm$ 0.282                                                    | 0.036          | 32.66              | 2.18           | 4.76         | 0.85        |
| Posterior cingulate cortex | <b>0.698 <math>\pm</math> 0.238</b>                                  | <b>0.006</b>   | <b>32.99</b>       | <b>2.93</b>    | <b>8.59</b>  | <b>0.83</b> |
| Insular cortex             | 0.411 $\pm$ 0.188                                                    | 0.037          | 27.80              | 2.19           | 4.79         | 0.88        |
| Parahippocampus            | <b>0.515 <math>\pm</math> 0.150</b>                                  | <b>0.002</b>   | <b>32.87</b>       | <b>3.43</b>    | <b>11.80</b> | <b>0.84</b> |
| Caudate nucleus            | 0.140 $\pm$ 0.190                                                    | 0.466          | 30.09              | 0.74           | 0.54         | 0.89        |
| Putamen                    | 0.444 $\pm$ 0.241                                                    | 0.075          | 32.77              | 1.84           | 3.39         | 0.77        |
| Thalamus                   | 0.260 $\pm$ 0.159                                                    | 0.112          | 29.27              | 1.64           | 10.78        | 0.71        |
| Hippocampus                | 0.231 $\pm$ 0.176                                                    | 0.201          | 28.58              | 1.31           | 1.71         | 0.79        |

Linear mixed-effects models (LMEMs) were used to assess the interaction of Mutation status (carrier/non-carrier) on the longitudinal relationship between <sup>11</sup>C-DED binding and <sup>18</sup>F-FDG uptake in 12 regions of interest, using the equation:  $^{18}\text{F-FDG}_{\text{ROI}} \sim \beta_0 + \beta_1 \text{ }^{11}\text{C-DED}_{\text{ROI}} + \beta_2 \text{ Mutation status} + \beta_3 \text{ }^{11}\text{C-DED}_{\text{ROI}} : \text{Mutation status (interaction)} + \text{Random intercept } (I) + \epsilon$ , where Mutation status is a categorical variable (carrier/non-carrier),  $\beta_1$ ,  $\beta_2$  and  $\beta_3$  are fixed-effects coefficients with  $\beta_3$  representing the coefficient of the interaction term, Random intercept takes into account the repeated measures in the same individual subject number *I*, and  $\epsilon$  is an error term. Associations that were significant after multiple comparisons correction using false discovery rate (FDR) are indicated in bold.

<sup>11</sup>C-DED = <sup>11</sup>C-deuterium-L-deprenyl; <sup>18</sup>F-FDG = <sup>18</sup>F-fluorodeoxyglucose;  $R^2_c$  = conditional coefficient of determination; SE = standard error

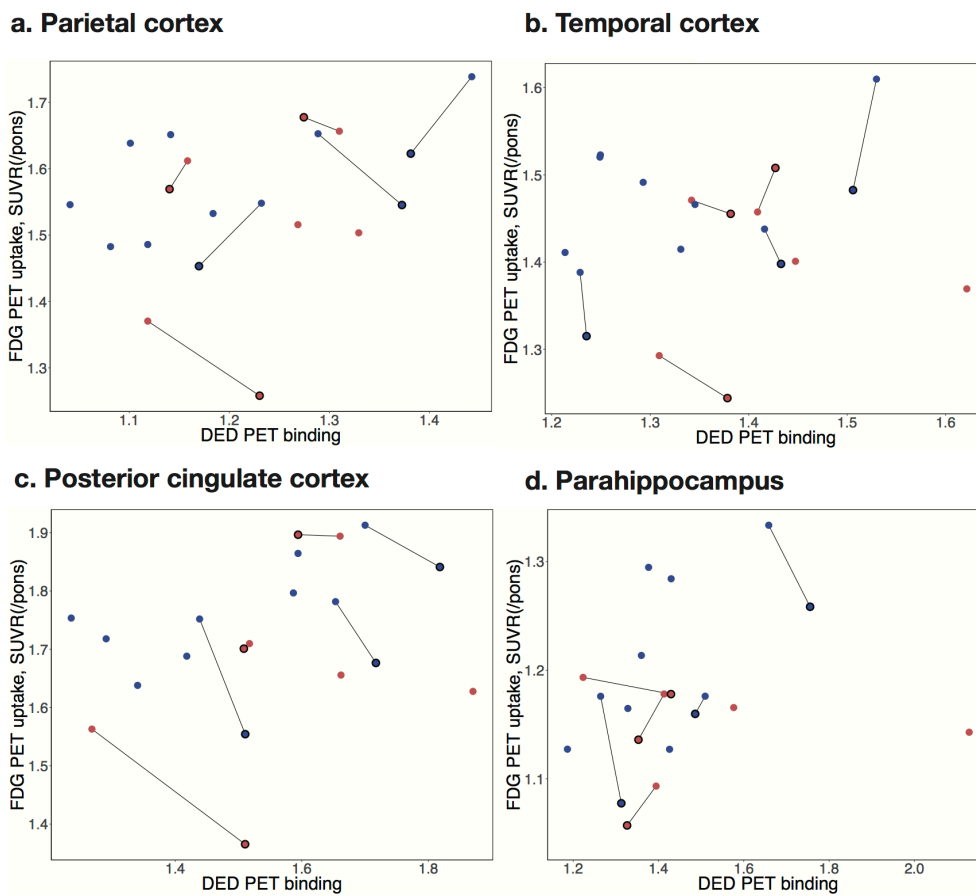

**Supplementary Fig. 1 Scatterplots illustrating the longitudinal patterns of  $^{11}\text{C}$ -DED binding and  $^{18}\text{F}$ -FDG uptake in mutation noncarriers.** The longitudinal relationships are illustrated in the following regions: **(a)** parietal cortex, **(b)** temporal cortex, **(c)** posterior cingulate cortex, and **(d)** parahippocampus. Blue circles = presymptomatic mutation carriers; red circles = symptomatic mutation carriers; symbols with black outline = follow-up data; symbols with no outline = baseline data.

DED =  $^{11}\text{C}$ -deuterium-L-deprenyl; FDG =  $^{18}\text{F}$ -fluorodeoxyglucose; SE = standard error; SUVR = standardised uptake value ratio
